# Supplementary material for: Dendritic gold nanowires supported on SiO2 nanoparticles fabricated by a seed growth method
Source: Royal Society of Chemistry journal article supplement (doi:10.1039/c6nj00161k), 2016-01-01
Supplement: c6nj00161k1.pdf [file c6nj00161k1.pdf]

**Electronic Supplementary Information**

**Dendritic Gold Nanowires Supported on SiO<sub>2</sub> Nanoparticles  
Fabricated by Seed Growth Method**

*Clara Morita-Imura, Takuya Mori, Yoshiro Imura\* and Takeshi Kawai\**

Department of Industrial Chemistry, Tokyo University of Science  
1-3, Kagurazaka, Shinjuku-ku, Tokyo, 162-8601, Japan

imura@ci.kagu.tus.ac.jp (Y. Imura)

kawai@ci.kagu.tus.ac.jp (K. Kawai)

## **Experimental**

### **Preparation of SiO<sub>2</sub>@Au NPs (Figures 4 and S2-4)**

#### (1) Effect of amount of HAuCl<sub>4</sub>

SiO<sub>2</sub>@Au NPs (0.05 mL) and 24 mM HAuCl<sub>4</sub> aqueous solution (0.1, 0.2, and 0.4 mL) were added to 2.0 wt% C18AA aqueous solution (1.0 mL). The mixture was left for 3 days at room temperature without stirring (Figure 4).

#### (2) Effect of C18AA concentration

SiO<sub>2</sub>@Au NPs (0.05 mL) and 24 mM HAuCl<sub>4</sub> aqueous solution (0.2 mL) were added to 0.5 and 4.0 wt% C18AA aqueous solution (1.0 mL). The mixture was left for 3 days at room temperature without stirring (Figure S2).

#### (3) Effect of preparation time

SiO<sub>2</sub>@Au NPs (0.05 mL) and 24 mM HAuCl<sub>4</sub> aqueous solution (0.2 mL) were added to 2.0 wt% C18AA aqueous solution (1.0 mL). The mixture was left for 4, 24, and 72 hours at room temperature without stirring (Figures 4b, 4c, and S3).

#### (4) Effect of reduction rate by adding NaBH<sub>4</sub>

SiO<sub>2</sub>@Au NPs (0.05 mL) and 24 mM HAuCl<sub>4</sub> aqueous solution (0.2 mL) were added to 2.0 wt% C18AA aqueous solution (1.0 mL). NaBH<sub>4</sub> (4.8 μmol) aqueous solution was added to the mixture, and left for 1 and 3 days at room temperature without stirring (Figure S4).

### **Effect of seed Au NPs on SiO<sub>2</sub> NPs (Figure 5)**

SiO<sub>2</sub> NPs without Au NPs (0.05 mL, Figure 3a and Figure S1a) and 24 mM HAuCl<sub>4</sub> aqueous solution (0.2 mL) were added to 2.0 wt% C18AA aqueous solution (1.0 mL). The mixture was left for 3 days at room temperature without stirring.

### **Morphological and dispersion stability (Figure 9)**

SiO<sub>2</sub>@Au DNWs were prepared by adding SiO<sub>2</sub>@Au NPs (0.05 mL) and 24 mM HAuCl<sub>4</sub> aqueous solution (0.2 mL) to 2 wt% C18AA aqueous solution (1.0 mL), and quickly adding 10 mM ascorbic acid aqueous solution (0.48 mL; 4.8 μmol) to the mixture. The pH value of SiO<sub>2</sub>@Au DNWs was 7.0 (Figure 7e). 1M NaOH aqueous solution was added to the SiO<sub>2</sub>@Au DNWs (1.0 mL), and the pH value was changed from 7.0 to 10.0 (Figure 9d). 1M HCl aqueous solution was added to the SiO<sub>2</sub>@AuDNWs (1.0 mL), and the pH value was changed from 7.0 to 5.0 and 3.0 (Figures 9e and f). Unsupported Au DNWs (Figure 5) were prepared by adding 24 mM HAuCl<sub>4</sub> aqueous solution (0.2 mL) and SiO<sub>2</sub> aqueous solution (0.05 mL) in 2 wt% C18AA aqueous solution (1.0 mL), left for 3

days at room temperature (Figure 5). 1M HCl aqueous solution and 1M NaOH aqueous solution were added to 1.0 mL of the unsupported Au DNWs dispersion solution (Figure 9a-c).

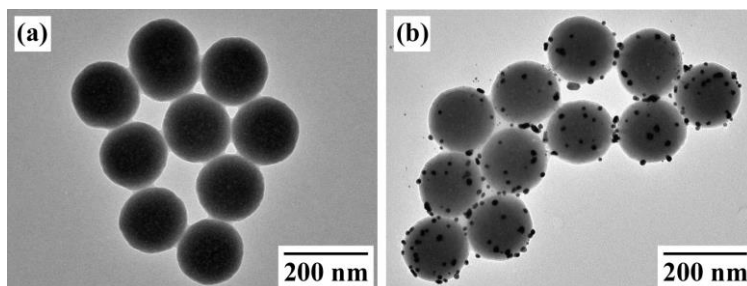

Figure S1. Low-magnification TEM images of (a) as-prepared SiO<sub>2</sub> NPs and (b) SiO<sub>2</sub>@Au NPs.

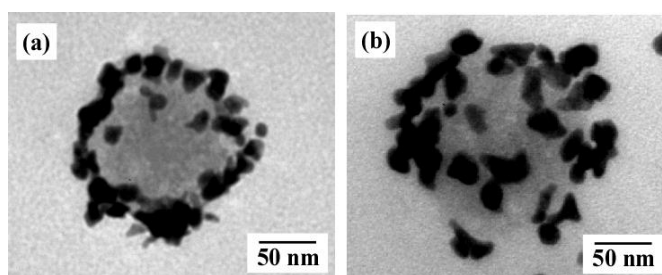

Figure S2. TEM images of SiO<sub>2</sub>@Au NPs prepared using (a) 0.5 wt% and (b) 4.0 wt% C18AA aqueous solution.

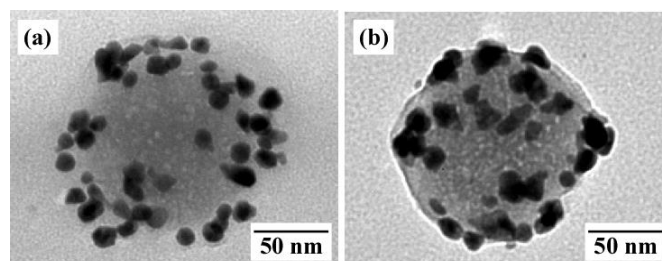

Figure S3. TEM images of SiO<sub>2</sub>@Au NPs prepared using 2 wt% C18AA (1.0 mL) and 24 mM HAuCl<sub>4</sub> (0.2 mL) at (a) 4 and (b) 24 hours.

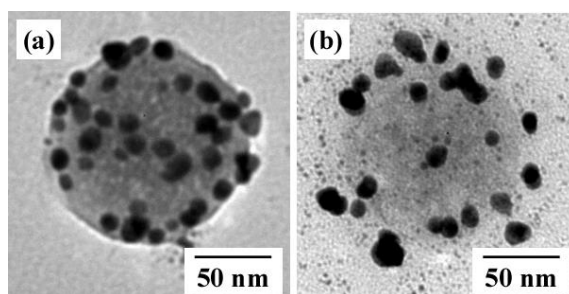

Figure S4. TEM images of SiO<sub>2</sub>@Au NPs prepared using 2 wt% C18AA (1.0 mL), 24 mM HAuCl<sub>4</sub> (0.2 mL), NaBH<sub>4</sub> (4.8 μmol) at (a) 1 and (b) 3 days.

**TEM-EDX measurement:** TEM-EDX spectra of SiO<sub>2</sub>@Au DNWs indicated that they were composed of Au and Si. The Cu and Fe peaks were from the TEM copper grid.<sup>[1]</sup>

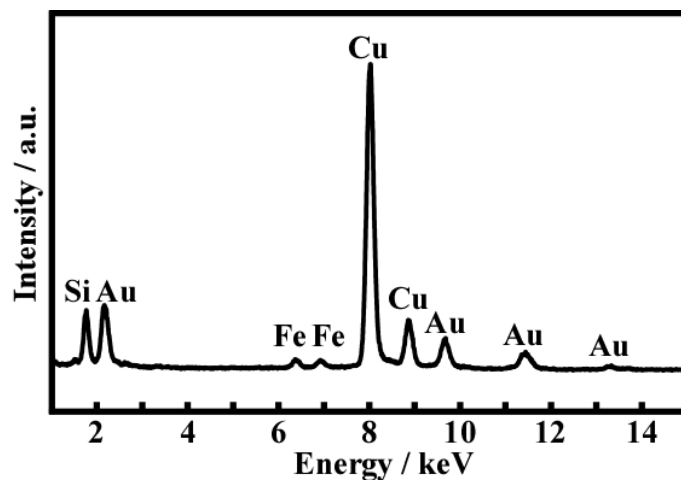

Figure S5. TEM-EDX spectra of SiO<sub>2</sub>@AuDNWs.

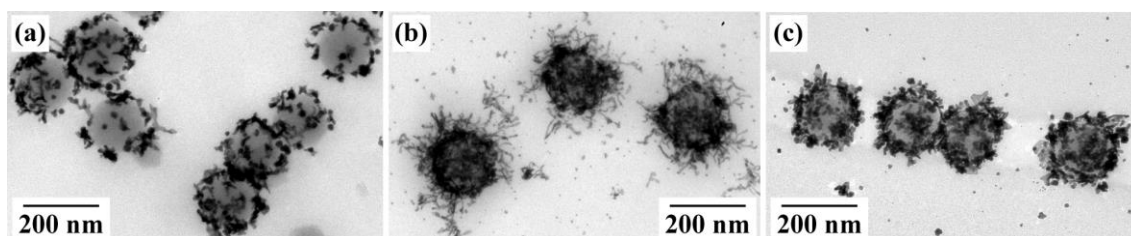

Figure S6. Low-magnification TEM images of SiO<sub>2</sub>@Au NCs prepared using (a) 0.96, (b) 4.8, and (c) 48  $\mu$ mol ascorbic acid after 3day.

### QCM measurement:

To determine the adsorbed amount of C18AA on Au, quartz crystal microbalance (QCM) was equipped using QCA 922 (SEIKO-EG&G). Au electrode was dipped in 30 mL of C18AA solution at pH 7 and 3, respectively. All measurements were equipped at 27°C. Here, the adsorbed mass of C18AA was estimated from frequency change ( $\Delta F$ ) for a QCM quartz resonator before and after adsorption using Sauerbrey equation, there is the linear dependence between the adsorbed mass  $\Delta m$  and  $\Delta F$ .

$$\Delta f = -2f_0^2 \frac{\Delta m}{A\sqrt{\mu_q \rho_q}} \quad (1)$$

Where  $f_0$  is the fundamental resonance frequency of crystal,  $\mu_q$  is the shear modulus,  $\rho_q$  is the density of quartz and  $A$  is the area of Au electrode. The relation is valid when the adsorbed mass is distributed evenly over the crystal and  $\Delta m$  is much smaller (2%) of the crystal and the adsorbed material is rigidly and thin. For the experiments, Au coated AT-cut quartz crystals were used, with a resonant frequency of 9 MHz and an area of 0.196 cm<sup>2</sup>. Sauebrey equation gives a mass sensitivity of 1.07 ng/Hz.

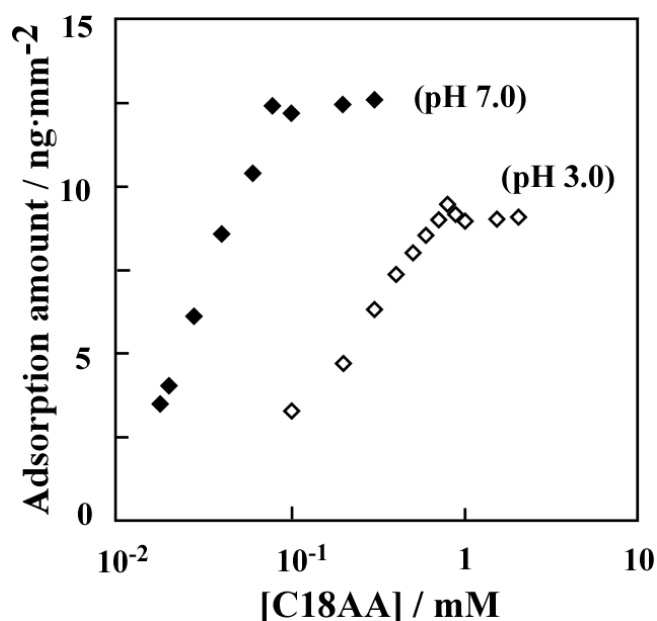

Figure S7. Adsorption amount of C18AA on Au surface, filled square: pH 7.0 and opened square: pH 3.0.

### Reference

1. Feng, H.; Yang, Y.; You, Y.; Li, G.; Guo, J.; Yu, T.; Shen, Z.; Wu, T.; Xing, B. *Chem. Commun.* **2009**, 1984-1986.; Imura, Y.; Tanuma, H.; Sugimoto, H.; Ito, R.; Hojo, S.; Endo, H.; Morita, C.; Kawai, T. *Chem. Commun.* **2011**, 47, 6380-6382.
